# **The association between caesarean section delivery and later life obesity in 21-24 year olds in an Urban South African birth cohort**

Eniola Sogunle, Gwinyai Masukume, Gill Nelson

School of Public Health, Faculty of Health Sciences, University of the Witwatersrand,

Johannesburg, South Africa,

## **Corresponding author:**

Eniola Sogunle

[eniolasogunle@yahoo.com](mailto:eniolasogunle@yahoo.com)

# **Abstract**

**Background:** Obesity is an important public health problem and rates have reached epidemic proportions in many countries. Studies have explored the association between infants delivered by caesarean section and their later life risk of obesity, in many countries outside Africa. As a result of the increasing caesarean section and obesity rates in South Africa, we investigated the association in this country.

**Methods:** This was a retrospective analysis of data that were collected from a prospective South African birth cohort (Birth to Twenty Plus), established in 1990. A total of 889 young adults aged 21-24 years were included in the analysis. Multiple logistic regression models were fitted to assess the association between mode of delivery and early adulthood obesity.

**Results:** Of the 889 young adults, 106 (11.9%) were obese while 72 (8.1%) were delivered by CS; of which 14 (19.4%) were obese. Caesarean section delivery was significantly associated with obesity in young adults after adjusting for potential confounders like gestational age (at delivery), birth weight, sex, maternal age, parity and education (OR 1.99, 95% CI 1.00–3.94,  $p=0.049$ ).

**Conclusion:** The association of caesarean section with early adulthood obesity should be interpreted with caution because data on certain key confounding factors such as mothers' pre-pregnancy body mass index and gestational diabetes were not available. Further research from Africa, with larger sample sizes and databases with useful linking of maternal and infant data, should be conducted.

# Introduction

Obesity is an important public health problem and rates have reached epidemic proportions in many countries - one in every five young people was estimated to be obese in 2012 in high and middle income countries [1]. Globally, 39% and 13% of individuals aged 18 years and older were overweight and obese, respectively, in 2016 [2]. In South Africa, the rates of overweight or obesity in 2016 were higher among women (61% in women and 31% in men) [3]. Obesity has been associated with adverse health outcomes such as type 2 diabetes, cardiovascular disease cancer, and premature mortality, in both adults and children [4–8] . Diet (high energy foods), physical inactivity, birth weight, genetics, and parity are commonly explored risk factors of obesity [9–11]. Mode of delivery at birth has also been suggested to be associated with obesity in later life.

Due to the rising rates of obesity, any hypothesized risk factor, such as caesarean section (CS) as a mode of child delivery, is worth exploring. Acknowledging that CSs are sometimes performed to prevent birth complications, biased motives have been identified [12,13] and the use of the procedure is increasing globally [14]. As many as one in three births was reported to be by CS in high-income countries such as the United States of America (USA) in 2017 [15]. The rates of CS in South Africa in 2014, reported in the 2016 South African Health Review, were estimated to be 70.8% in the private health sector, and 24.7% in the public health sector (as reported by the District Health Information System (DHIS) which uses routinely collected health information to manage health services) [16]. An underlying mechanism for the proposed association between CS and later life obesity is the reported limited microbial diversity of offspring delivered by CS [17,18]. This is presumed to persist to adulthood [19].

A number of studies have explored the association between CS and later life obesity. Three systematic reviews and meta-analyses reported increased pooled effect size estimates in young adults (YAs) delivered by CS (such individuals were more likely to be obese) [20–22]. Five additional studies reported similar findings [19,23–26]. However, some studies did not find significant associations, leading to inconsistent findings [27,28]. All previous studies have been conducted in countries outside Africa [19,23–35] and, to our knowledge, nothing is known in the African context. The aim of the study reported in this paper was to investigate the association between CS delivery and early adulthood obesity among singletons in an ongoing longitudinal birth cohort (Birth to Twenty Plus – Bt20+) with more than two decades of follow-up in an urban region in South Africa [36].

## Methods

### *Study design and setting*

This was a retrospective analysis of data that were collected from a prospective cohort study established in 1990. Birth to Twenty Plus (formerly Birth to Ten) is an ongoing prospective South African birth cohort established in Soweto, Johannesburg, Gauteng in 1990 [36]. The cohort comprises 3 273 singleton children of mothers who were recruited from antenatal clinics and had an expected delivery date from 23 April to 8 June 1990. Consent to participate in the study was provided by the mothers at enrolment; all subsequent data were also collected with signed consent. Participants have been followed up through administered questionnaires, contact with parents or caregivers, telephone calls, and field visits. Further information on the cohort has been published elsewhere [36,37].

# *Exposure and outcome variables*

Information on mode of delivery was copied by the investigators of the Bt20+ cohort from the official birth notification forms compiled at the local authority. Information on CS and vaginal deliveries, i.e. normal (NVD) and assisted (AVD - forceps and vacuum) was available for this study. A digital scale and wall mounted stadiometer were used to measure weight and standing height, to the nearest 0.1 kg and 0.1 cm, respectively. These measurements were taken by trained research personnel. Body Mass Index (BMI) was calculated using the formula weight/height<sup>2</sup> (kg/m<sup>2</sup>). We defined obesity (BMI  $\geq 30$  kg/m<sup>2</sup>), as per the World Health Organization (WHO) [38].

The two sample proportion test was used to compute the power of the study, i.e. to check if the study was adequately powered to answer the research question. Proportions of obese participants were computed for each mode of delivery with 95% confidence intervals (CIs) and 80% power.

# *Potential confounders*

We reviewed published literature on factors associated with obesity and mode of delivery, and identified variables of interest from similar studies. Young adults' characteristics included gestational age (at delivery), sex, ethnicity, age, education, alcohol consumption, cigarette smoking, birth weight (low (<2.5 kg), normal (2.5-4.0 kg), macrosomic (>4 kg)), and breastfeeding duration. Mothers' characteristics included parity, age at delivery, and education. We generated infants' birth weight corrected for gestational age and sex (in centiles) by using the INTERGROWTH-21st calculator to compare these variables with an international standard [39]. Participant's age was calculated as the difference between date of birth and date of data collection.

# *Statistical analysis*

To examine if the study participants were different from those in the primary cohort, socio-demographic characteristics were compared with those in the primary cohort. Using the Kruskal-Wallis test, Pearson's Chi-square test, and Fisher's exact test, where appropriate, we assessed the differences in participants' characteristics (early life, young adult and maternal) across the modes of delivery and BMI categories, and compared the sex-stratified prevalence of obesity for each mode of delivery. Regarding missing values, our study's covariates had less than 10% missing values and additional 'unknown' categories were created for those covariates with missing observations. Schafer *et al.* (1999) and Bennett *et al.* (2001) suggested that less than 10% missing values in covariates is less likely to result in bias [40,41].

To evaluate the association between CS and early adulthood obesity, we calculated the odds ratio (OR) and 95% CIs, using logistic regression models. Young adults' sex and birth weight in kg, mothers' parity, and education at YA's birth were included in the adjusted models. Furthermore, we conducted a post-estimation (Wald) test to investigate the differences between obesity rates across sex and birth weight categories (heterogeneity). This was done by introducing cross product (interaction) terms between mode of delivery and YAs' sex or birth weight in the final adjusted model. Sex and birth weight stratified models were then computed. Additional analysis included NVD and AVD, combined, as the comparison group.

Although lifestyle and behavioural characteristics, such as YAs' diet, physical activity, smoking habits, and alcohol consumption, have been associated with obesity, it has been suggested that they are not true confounders in the analysis of the association between mode of delivery and later life obesity [19]. Nevertheless, to address the possibility of residual confounding, these characteristics were adjusted for in the sensitivity analysis. Similarly,

models adjusting exclusively for early life factors were computed. We also adjusted for YAs' birth weight as a continuous covariate, and YA's breastfeeding duration at infancy, mother's parity and mother's age at delivery as categorical covariates, in subsequent analyses. P values <0.05 were considered statistically significant. All analyses were conducted using Stata® IC 14 (StataCorp LP College Station, TX).

### *Ethical considerations*

Prior to analysing the data, we obtained ethical approval from the Human Research Ethics Committee of the University of the Witwatersrand (clearance certificate number M161184). Anonymised data were received from the gatekeeper of the primary study and a data sharing agreement was signed to ensure confidentiality and to limit access to the data.

## **Results**

The study participants comprised 889 21-24 year old YAs after excluding those in the primary cohort with missing data; one cohort member was excluded for being older than 24 (Figure 1). Of the final analytic sample, 72 (8.1%) were delivered by CS of which 14 (19.4%) were obese. A 1.00 or 100% study power and an estimated sample size of 177 were obtained using the proportions of obese participants delivered by NVD (11.1%) and CS (19.4%), in our final sample.

### **Figure 1:** Flowchart showing the study population and selection of study participants

The study participants' characteristics by mode of delivery category are presented in Tables 1 and 2. As seen in Table 1, CSs were more frequent than NVDs in those who had low birth weight or macrosomia, and in Indians and Coloureds (non-Black participants).

| Table 1: Socio-demographic characteristics by mode of delivery                                                                                                                                                |                  |      |       |      |      |      |      |      |                    |
|---------------------------------------------------------------------------------------------------------------------------------------------------------------------------------------------------------------|------------------|------|-------|------|------|------|------|------|--------------------|
|                                                                                                                                                                                                               | Mode of delivery |      |       |      |      |      |      |      | P value            |
|                                                                                                                                                                                                               | Total            |      | NVD   |      | AVD  |      | CS   |      |                    |
|                                                                                                                                                                                                               | N=889            |      | n=793 |      | n=24 |      | n=72 |      |                    |
|                                                                                                                                                                                                               | n                | %    | n     | %    | n    | %    | n    | %    |                    |
| Young adult characteristic                                                                                                                                                                                    |                  |      |       |      |      |      |      |      |                    |
| Sex                                                                                                                                                                                                           |                  |      |       |      |      |      |      |      | 0.890              |
| Male                                                                                                                                                                                                          | 444              | 49.9 | 398   | 50.2 | 11   | 45.8 | 35   | 48.6 |                    |
| Female                                                                                                                                                                                                        | 445              | 50.1 | 395   | 49.8 | 13   | 54.2 | 37   | 51.4 |                    |
| Ethnicity                                                                                                                                                                                                     |                  |      |       |      |      |      |      |      | <0.001             |
| Black                                                                                                                                                                                                         | 803              | 90.3 | 727   | 91.7 | 17   | 70.8 | 59   | 81.9 |                    |
| Non-Black                                                                                                                                                                                                     | 87               | 9.7  | 66    | 8.3  | 7    | 29.2 | 13   | 18.1 |                    |
| Alcohol intake                                                                                                                                                                                                |                  |      |       |      |      |      |      |      | 0.617              |
| No                                                                                                                                                                                                            | 560              | 63.0 | 502   | 63.3 | 16   | 66.7 | 42   | 58.3 |                    |
| Yes                                                                                                                                                                                                           | 264              | 29.7 | 231   | 29.1 | 8    | 33.3 | 25   | 34.7 |                    |
| Unknown                                                                                                                                                                                                       | 65               | 7.3  | 60    | 7.6  | 0    | -    | 5    | 6.9  |                    |
| Smoking                                                                                                                                                                                                       |                  |      |       |      |      |      |      |      | 0.479              |
| No                                                                                                                                                                                                            | 530              | 59.6 | 472   | 59.5 | 12   | 50.0 | 47   | 59.5 |                    |
| Yes                                                                                                                                                                                                           | 359              | 40.4 | 321   | 40.5 | 12   | 50.0 | 26   | 40.5 |                    |
| Education                                                                                                                                                                                                     |                  |      |       |      |      |      |      |      | 0.304              |
| <grade 12                                                                                                                                                                                                     | 349              | 39.3 | 305   | 38.5 | 12   | 50.0 | 32   | 44.4 |                    |
| ≥ grade 12                                                                                                                                                                                                    | 531              | 59.7 | 479   | 60.4 | 11   | 45.8 | 40   | 55.6 |                    |
| Unknown                                                                                                                                                                                                       | 10               | 1.1  | 9     | 1.1  | 1    | 4.2  | 0    | -    |                    |
| Early life and maternal Characteristic                                                                                                                                                                        |                  |      |       |      |      |      |      |      |                    |
| Mother's post-school education                                                                                                                                                                                |                  |      |       |      |      |      |      |      | 0.187 <sup>f</sup> |
| No                                                                                                                                                                                                            | 792              | 92.2 | 709   | 89.4 | 23   | 95.8 | 59   | 81.9 |                    |
| Yes                                                                                                                                                                                                           | 67               | 7.8  | 59    | 7.4  | 0    | 0.0  | 8    | 11.1 |                    |
| Unknown                                                                                                                                                                                                       | 30               | 3.4  | 25    | 3.2  | 1    | 4.2  | 5    | 6.9  |                    |
| Birth weight (kg)                                                                                                                                                                                             |                  |      |       |      |      |      |      |      | 0.018 <sup>f</sup> |
| LBW (<2.5)                                                                                                                                                                                                    | 74               | 8.3  | 63    | 7.9  | 4    | 16.7 | 7    | 9.7  |                    |
| Normal (2.5 - 4.0)                                                                                                                                                                                            | 798              | 89.8 | 718   | 90.5 | 20   | 83.3 | 60   | 83.3 |                    |
| Macrosomia (>4)                                                                                                                                                                                               | 16               | 1.8  | 11    | 1.4  | 0    | -    | 5    | 6.9  |                    |
| Unknown                                                                                                                                                                                                       | 1                | 0.1  | 1     | 0.1  | 0    | -    | 0    | -    |                    |
| Birth weight (centile)                                                                                                                                                                                        |                  |      |       |      |      |      |      |      |                    |
| SGA (<10 <sup>th</sup> )                                                                                                                                                                                      | 79               | 8.9  | 68    | 8.6  | 5    | 20.8 | 6    | 8.3  | 0.139 <sup>f</sup> |
| AGA (≥10 <sup>th</sup> -≤90 <sup>th</sup> )                                                                                                                                                                   | 680              | 76.5 | 610   | 76.9 | 18   | 75.0 | 53   | 72.2 |                    |
| LGA (>90 <sup>th</sup> )                                                                                                                                                                                      | 129              | 14.5 | 114   | 14.4 | 1    | 4.2  | 14   | 19.4 |                    |
| Unknown                                                                                                                                                                                                       | 1                | 0.1  | 1     | 0.1  | 0    | -    | 0    | -    |                    |
| Non-black – Indians and Coloured, LBW – low birth weight, SGA – small for gestational age, AGA – appropriate for gestational age, LGA – large for gestational age, NVD/AVD – Normal/Assisted vaginal delivery |                  |      |       |      |      |      |      |      |                    |
| Fisher's exact (f)                                                                                                                                                                                            |                  |      |       |      |      |      |      |      |                    |

175

176 No statistically significant differences were observed for gestational age, parity, breastfeeding

177 duration or age at delivery (Table 2).

**Table 2:** Maternal characteristics of the study participants by mode of delivery

|                                                                                                             | <b>Total<br/>N=889</b> |             | <b>NVD<br/>n=793</b> |             | <b>AVD<br/>n=24</b> |             | <b>CS<br/>n=72</b> |             | <b>P<br/>value</b> |
|-------------------------------------------------------------------------------------------------------------|------------------------|-------------|----------------------|-------------|---------------------|-------------|--------------------|-------------|--------------------|
|                                                                                                             | Med                    | IQR         | Med                  | IQR         | Med                 | IQR         | Med                | IQR         |                    |
| Gestational age (weeks) at delivery                                                                         | 38.0                   | 38.0 – 39.0 | 38.0                 | 38.0 – 39.0 | 38.0                | 38.0 – 40.0 | 38.0               | 37.5 – 39.0 | 0.074              |
| Parity at delivery                                                                                          | 2.0                    | 1.0 – 3.0   | 2.0                  | 1.0 – 3.0   | 1.0                 | 1.0 – 3.0   | 2.0                | 1.0 – 3.0   | 0.136              |
| Breastfeeding duration (months)                                                                             | 8.0                    | 1.0 – 20.0  | 9.0                  | 1.0 – 20.0  | 6.5                 | 2.5 – 24.0  | 6.0                | 0.6 – 18.0  | 0.489              |
| Age at delivery (years)                                                                                     | 24.0                   | 20.0 – 30.0 | 24.0                 | 20.0 – 30.0 | 23.5                | 19.0 – 30.0 | 25.5               | 21.0 – 30.0 | 0.541              |
| Med – median, IQR – interquartile range, NVD/AVD – Normal/Assisted vaginal delivery, CS – caesarean section |                        |             |                      |             |                     |             |                    |             |                    |

178

179 Compared to the primary cohort, the study participants were more likely to be Black (78.5%  
180 vs 90.3%), smokers (19.3% vs 40.4%), have mothers who had no post school education (79.6%  
181 vs 92.2%). They were also breast fed for a longer period, and had mothers who had longer  
182 gestational age and were younger when they gave birth, than those in the primary cohort. There  
183 were no differences between YAs sex, mode of delivery, education, alcohol intake, BMI and  
184 birth weight, and mothers' parity, between the primary cohort and the study participants  
185 ( $p>0.05$ ). Certain characteristics were associated with BMI, such as YA's sex ( $p<0.001$ ),  
186 ethnicity ( $p=0.039$ ), smoking habit ( $p<0.001$ ), and education ( $p<0.001$ ); and mothers' parity  
187 at delivery ( $p=0.019$ ) (data not shown).

188

189 Sex-stratified prevalence of obesity and BMI across mode of delivery categories are presented  
190 in Tables 3 and 4, respectively. Overall, the prevalence of obesity was higher in CS-delivered  
191 participants than in those delivered through either AVD or NVD, but there were no differences  
192 when the results were stratified by sex (Table 3).

193

| <b>Table 3: Prevalence of obesity in each mode of delivery category among study participants, by sex</b> |          |          |          |               |                |
|----------------------------------------------------------------------------------------------------------|----------|----------|----------|---------------|----------------|
|                                                                                                          | <b>N</b> | <b>n</b> | <b>%</b> | <b>95% CI</b> | <b>P value</b> |
| <b>Overall</b>                                                                                           |          |          |          |               | 0.042          |
| NVD                                                                                                      | 793      | 88       | 11.1     | 9.1 – 13.5    |                |
| AVD                                                                                                      | 24       | 4        | 16.7     | 6.4 – 37.0    |                |
| CS                                                                                                       | 72       | 14       | 19.4     | 11.9 – 30.2   |                |
| Total                                                                                                    | 889      | 106      | 11.9     | 9.9 – 14.2    |                |
| <b>Male</b>                                                                                              |          |          |          |               | 0.190          |
| NVD                                                                                                      | 398      | 9        | 2.3      | 1.2 – 4.3     |                |
| AVD                                                                                                      | 11       | 1        | 9.1      | 1.3 – 44.0    |                |
| CS                                                                                                       | 35       | 3        | 8.6      | 2.8 – 23.5    |                |
| Total                                                                                                    | 444      | 13       | 2.9      | 1.7 – 5.0     |                |
| <b>Female</b>                                                                                            |          |          |          |               | 0.133          |
| NVD                                                                                                      | 395      | 79       | 20.0     | 16.3 – 24.2   |                |
| AVD                                                                                                      | 13       | 3        | 23.1     | 7.6 – 52.2    |                |
| CS                                                                                                       | 37       | 11       | 29.7     | 16.8 – 46.2   |                |
| Total                                                                                                    | 445      | 93       | 20.9     | 17.4 – 24.9   |                |
| CI – confidence interval, VD – vaginal delivery, CS – caesarean section                                  |          |          |          |               |                |

The median BMI of males (but not females) delivered by CS was higher than that of those delivered by AVD or NVD (Table 4).

| <b>Table 4: Body mass index of study participants by mode of delivery</b>                                                                |          |            |             |                |
|------------------------------------------------------------------------------------------------------------------------------------------|----------|------------|-------------|----------------|
|                                                                                                                                          | <b>N</b> | <b>Med</b> | <b>IQR</b>  | <b>P value</b> |
| <b>Overall</b>                                                                                                                           |          |            |             | 0.135          |
| NVD                                                                                                                                      | 793      | 22.1       | 19.8 – 26.1 |                |
| AVD                                                                                                                                      | 24       | 21.6       | 19.0 – 27.4 |                |
| CS                                                                                                                                       | 72       | 23.3       | 20.7 – 23.3 |                |
| Total                                                                                                                                    | 889      | 22.2       | 19.9 – 26.3 |                |
| <b>Male</b>                                                                                                                              |          |            |             | 0.018          |
| NVD                                                                                                                                      | 398      | 20.8       | 19.3 – 23.3 |                |
| AVD                                                                                                                                      | 11       | 20.6       | 19.0 – 22.2 |                |
| CS                                                                                                                                       | 35       | 21.8       | 20.3 – 24.8 |                |
| Total                                                                                                                                    | 444      | 20.8       | 19.4 – 23.3 |                |
| <b>Female</b>                                                                                                                            |          |            |             |                |
| NVD                                                                                                                                      | 395      | 24.6       | 21.0 – 28.9 | 0.861          |
| AVD                                                                                                                                      | 13       | 25.6       | 19.0 – 28.0 |                |
| CS                                                                                                                                       | 37       | 25.2       | 21.4 – 30.0 |                |
| Total                                                                                                                                    | 445      | 24.2       | 21.0 – 29.0 |                |
| Med – median, IQR- interquartile range, BMI – body mass index<br>CI – confidence interval, VD – vaginal delivery, CS – caesarean section |          |            |             |                |

As seen in Table 5, birth by CS was associated with an almost two-fold increase in the odds of obesity among YAs aged 21-24 years, in the crude analysis. After adjusting for YAs' sex and birth weight, and mothers' parity and education at delivery as potential confounders, a similar estimate was observed.

**Table 5:** The association between mode of delivery and early adulthood obesity, stratified by sex and birth weight (using normal BMI as reference)

| Variable                      | n <sub>o</sub> /N <sub>T</sub> | %    | OR   | 95%CI        | P value |
|-------------------------------|--------------------------------|------|------|--------------|---------|
| <b>Main analysis</b>          |                                |      |      |              |         |
| <i>crude</i>                  |                                |      |      |              |         |
| NVD                           | 88/793                         | 11.1 | 1.00 | reference    |         |
| AVD                           | 4/24                           | 16.7 | 1.60 | 0.54 – 4.80  | 0.400   |
| CS                            | 14/72                          | 19.4 | 1.93 | 1.04 – 3.61  | 0.039   |
| <i>Adjusted</i>               |                                |      |      |              |         |
| NVD                           | 88/792                         | 11.1 | 1.00 | reference    |         |
| AVD                           | 4/24                           | 16.7 | 1.69 | 0.50 – 5.69  | 0.395   |
| CS                            | 14/72                          | 19.4 | 1.99 | 1.00 – 3.94  | 0.049   |
| <b>Male</b>                   |                                |      |      |              |         |
| NVD                           | 9/397                          | 2.3  | 1.00 | reference    |         |
| AVD                           | 1/11                           | 9.1  | 4.70 | 0.44 – 50.68 | 0.203   |
| CS                            | 3/35                           | 8.6  | 4.27 | 1.05 – 17.33 | 0.042   |
| <b>Female</b>                 |                                |      |      |              |         |
| NVD                           | 79/395                         | 20.0 | 1.00 | reference    |         |
| AVD                           | 3/13                           | 23.1 | 1.28 | 0.34 – 4.81  | 0.717   |
| CS                            | 11/37                          | 29.7 | 1.77 | 0.82 – 3.85  | 0.149   |
| <b>Birth weight &lt;3.1kg</b> |                                |      |      |              |         |
| NVD                           | 46/420                         | 11.0 | 1.00 | reference    |         |
| AVD                           | 0/10                           | –    |      | –            | –       |
| CS                            | 5/30                           | 16.7 | 1.41 | 0.47 – 4.25  | 0.542   |
| <b>Birth weight ≥3.1kg</b>    |                                |      |      |              |         |
| NVD                           | 42/372                         | 11.3 | 1.00 | reference    |         |
| AVD                           | 4/14                           | 28.6 | 2.29 | 0.53 – 9.89  | 0.267   |
| CS                            | 9/42                           | 21.4 | 2.74 | 1.07 – 7.01  | 0.036   |

OR – odds ratio, CI – confidence interval, NVD/AVD – Normal/Assisted vaginal delivery, CS – caesarean section.

n<sub>o</sub> – number of participants with outcome(s) in row group

N<sub>T</sub> – total number of participants in row group

Adjusted for YAs' sex and birth weight; mothers' parity and education at YA's birth in all models.

Although no interaction was found between mode of delivery and either sex or birth weight in the final adjusted models, obesity rates were statistically different across the sex ( $p < 0.001$ ) and birth weight ( $p = 0.027$ ) categories in these models, indicating heterogeneity (data not shown). Among male YAs and participants who had a mean birth weight of at least 3.1 kg, CS was associated with a statistically significant higher odds of obesity compared to NVD.

To address the possibility of residual confounding and to determine if the results held up under different scenarios, a series of sensitivity analyses were conducted. The odds of being obese if delivered by CS were 1.95 times the odds of being obese if delivered by AVD or NVD (Table 6). The additional adjustment for YA's breastfeeding duration, smoking habit and alcohol intake, as well as treating certain covariates as linear or categorical in the sensitivity analyses, did not change the conclusions reached from the results of the original analyses. The observed association was not statistically significant when only early life factors (YAs' sex, birth weight and breastfeeding duration; and mothers' parity, gestational age, age and education at delivery) were adjusted for.

Assuming causality, we found that 12 CS births would be required to have one case of YA obesity (absolute risk increase 8.3%; numbers needed to harm 12; 95% CI 5.63 – 95.05).

**Table 6:** Sensitivity analysis: examining the association between mode of delivery and early adulthood obesity under different scenarios

|                                                                         | OR   | 95% CI      | P value |
|-------------------------------------------------------------------------|------|-------------|---------|
| <b><i>Combined normal and assisted vaginal delivery</i></b>             |      |             |         |
| VD (normal and assisted)                                                | 1.00 | reference   |         |
| CS                                                                      | 1.95 | 0.99 – 3.87 | 0.054   |
|                                                                         |      |             |         |
| <b><i>Controlling for confounders</i></b>                               |      |             |         |
| <b><i>Lifestyle and behavioural characteristics + main analysis</i></b> |      |             |         |
| NVD                                                                     | 1.00 | reference   |         |
| AVD                                                                     | 1.95 | 0.54 – 5.93 | 0.337   |
| CS                                                                      | 1.80 | 0.99 – 3.65 | 0.053   |
| <b><i>Early life factors only</i></b>                                   |      |             |         |
| NVD                                                                     | 1.00 | reference   |         |
| AVD                                                                     | 1.73 | 0.61 – 4.93 | 0.304   |
| CS                                                                      | 1.80 | 0.94 – 3.46 | 0.077   |
| <b><i>Covariates linear/categorical</i></b>                             |      |             |         |
| NVD                                                                     | 1.00 | reference   |         |
| AVD                                                                     | 1.63 | 0.49 – 5.40 | 0.424   |
| CS                                                                      | 1.98 | 1.00 – 3.91 | 0.049   |

OR – odds ratio, CI – confidence interval, NVD/AVD – Normal/Assisted vaginal delivery  
***Adjustment for confounders***

- i. Combined NVD and AVD – adjusted for YA’s sex and birth weight; mothers’ parity, age, gestational age, and education at YA’s birth.
- ii. Covariates linear/categorical – adjusted for YA’s birth weight (continuous), breastfeeding duration at infancy (categorical); mother’s parity and age at YA’s birth (categorical) + other covariates in main analysis.
- iii. Lifestyle and behavioural characteristics – adjusted for YA’s breastfeeding duration during infancy, smoking habit, and alcohol intake + other covariates in main analysis.
- iv. Early life factors only – adjusted for YA’s sex, birth weight and breastfeeding duration at infancy; mothers’ parity, gestational age, age and education at YA’s birth.

## Discussion

### *Findings and evidence from previous studies*

In this analysis of 21-24 year old South Africans from a longitudinal urban birth cohort, CS was associated with obesity in early adulthood. Among males and those with a birth weight  $\geq 3.1$  kg, CS was statistically associated with an increased odds of obesity. The magnitude of the association among females and those with a  $< 3.1$  kg birth weight is of particular clinical

concern. The confidence intervals of the ORs in the stratified analyses were wide, indicating low precision, due to the small sample size. Most of the sensitivity analyses supported the finding of an association between CS and early adulthood obesity. A marginal statistical significance was observed when early life and maternal characteristics were adjusted for, regardless of their collinearity or correlation with other variables and their effect on the primary predictor.

Significant associations between CS and obesity in early adulthood have been previously reported, despite the inconsistencies in some studies [27,28]. In a systematic review and meta-analysis by Darmasseelane *et al.* (2014), comprising studies published prior to 31 March 2012, the odds of being obese among CS-delivered YAs (aged 18 years or older) from 11 studies, was 22% higher than the odds of being obese among YAs delivered vaginally (OR 1.22, 95% CI 1.05-1.42) [20]. Results from a meta-analysis by Li *et al.* (2013) support this association among YAs aged 19 or older (OR 1.50, 95% CI 1.02-1.20) [21]. The studies included in these reviews were conducted independently in different countries (Finland, England, Scotland, Sweden, Brazil, Netherlands, China, India, and Denmark). Among Brazilian YAs aged 23-25 years old, Mesquita *et al.* (2013) and Bernardi *et al.* (2015) reported increase in fat accumulation due to delivery by CS: measured by either waist-hip ratio (IRR 1.45, 95% CI 1.18-1.79) [23] or BMI ( $\beta$  coefficient 0.12, 95% CI 0.01-0.03) [24]. More recently, Yuan *et al.* (2016) and Barros *et al.* (2017) reported increased risks of obesity in CS-delivered YAs (RR 1.15, 95% CI 1.06-1.26, n= 8 486;  $\beta$  coefficient 0.15, 95% CI 0.08-0.23, n= 1 794, respectively) in Boston (USA) and Pelotas (Brazil) [19,26]. Finally, in a commentary published in 2017, Kuhle *et al.* (2017) supported the association [42].

The aforementioned studies were all conducted outside Africa. However, some of the study sites were in upper-middle income countries, such as Brazil and China which are similar, socio-economically, to South Africa, and hence their results are comparable to those from our study.

### *Underlying mechanism*

It has been suggested that infants born via VD are exposed mainly to microorganisms in the birth canal or vaginal environment, and that those delivered by CS are exposed to micro flora on their mother's skin [43–45]. The abundance of *Coprococcus* and *Ruminococcus* of the family Lachnospiraceae was also reported by Tun *et al.* (2018) in infants delivered through CS – signifying dysbiosis in early life [44]. The investigators further explained the impact of family Lachnospiraceae in promoting adiposity.

Differences in intestinal bacterial colonisation; such as certain *Bifidobacteria spp.* that contribute to digestion and infant intestine development have been reported to be absent in infants delivered by CS [46]. Kalliomäki *et al.* (2008) reported that, compared to those of normal BMI, overweight seven year old participants had lower Bifidobacteria counts at age one and six years [47]. In addition, infants delivered by CS had almost no *Bifidobacteria spp.* in their faecal samples in studies by Huurre *et al.* (2008) and Biasucci *et al.* (2008) [48,49]. Nonetheless, it is possible that the underlying reason or indication for CS delivery could be a cause of later life obesity. This is because certain clinical states resulting in CS, as well as antibiotics administered during CS, have been suggested to increase the tendency of offspring obesity [50–52].

## *Limitations and strengths*

A limitation of this study is that the exposure and outcome assessments were dependent on the accuracy of the data collected from the Bt20+ cohort. In addition, the current surge of CS in South Africa was not reflected in the results; only 72 women gave birth through CS. Consequently, the 95% CIs were wide, indicating low precision of the ORs. We did not have the relevant data to examine the proposed mechanism underlying the association between CS and obesity in later life (i.e. deprivation of CS-born infants of microorganisms essential for regulating digestion). Caesarean delivery was not recorded as being elective or an emergency. It has been proposed that differences in intestine microbiota composition might arise due to prolonged delivery or ruptured fetal membranes [30,53], but this could not be investigated. In addition, the proposed effect (obesity) of antibiotics administered during CS on offspring's delivered through the procedure, could not be assessed due to lack of data. Furthermore, key pre-pregnancy information was not available, e.g. mothers' BMI (height and weight); gestational diabetes, preeclampsia, or pregnancy-induced hypertension; smoking habits; information about previous CS; and family income. The absence of these variables might have resulted in residual confounding, leading to higher point estimates than observed in previous studies.

The strength of this analysis was the availability of data to estimate associations between CS and obesity in later life. We were also able to demonstrate temporality as the exposure (CS) preceded the outcome (obesity in early adulthood). Additional strengths of the study were the availability of information on important early life factors of YAs, and prospectively collected data in the cohort.

## Conclusion

Caesarean section as a mode of delivery was statistically associated with obesity in the study participants. Further research is required in South Africa, and Africa in general, using routinely collected data that provide useful linking of maternity data with information in other databases. This will help to identify larger study populations and minimize costs, while investigating the association across BMI categories and exploring the underlying mechanisms for the association. Birth weight- and sex-stratified analyses, taking into account the potential interaction with mode of delivery, and differences in obesity rates, should be performed, as mean birth weights differ across and between populations. The reported increased odds of obesity in later life after CS, including those found in this study, support the plausibility of a biological link and should be considered as a motivating factor to reduce CS as a mode of delivery unless clinically indicated.

## Acknowledgements

We thank the Developmental Pathways for Health Research Unit (DPHRU) of the University of the Witwatersrand and the investigators of the Birth to Twenty Plus cohort for granting permission to use their data to conduct this study, as well as the study participants without whom this study would not have been possible.

# REFERENCES

1. Van der Merwe M. Obesity in childhood and adolescence. South African Medical Journal. 2012 May;102(5): 289-.
2. World Health Organization. Obesity and overweight. 2014. [Accessed 2019 Mar 15]. Available from: <https://www.who.int/en/news-room/fact-sheets/detail/obesity-and-overweight>
3. South Africa Demographic and Health Survey. 2016 [Accessed 2019 Mar 15]. Available from: <https://www.dhsprogram.com/pubs/pdf/FR337/FR337.pdf>
4. De Mutsert R, Sun Q, Willett WC, Hu FB, van Dam RM. Overweight in Early Adulthood, Adult Weight Change, and Risk of Type 2 Diabetes, Cardiovascular Diseases, and Certain Cancers in Men: a Cohort Study. American Journal of Epidemiology. 2014 Apr 30;179(11):1353-65. [Accessed 2019 Mar 22]. Available from: <https://www.ncbi.nlm.nih.gov/pmc/articles/PMC2924235/>
5. Fuemmeler BF, Pendzich MK, Tercyak KP. Weight, dietary behavior, and physical activity in childhood and adolescence: implications for adult cancer risk. Obesity Facts. 2009 Jul 1;2(3):179–86. [Accessed 2019 Mar 22]. Available from: <https://www.ncbi.nlm.nih.gov/pmc/articles/PMC2924235/>
6. Neovius K, Neovius M, Rasmussen F. The combined effects of overweight and smoking in late adolescence on subsequent disability pension: a nationwide cohort study. International Journal of Obesity. 2010 Jan 1;34(1):75-82. [Accessed Mar 23]. Available from: <http://dx.doi.org/10.1038/ijo.2009.178>
7. Stevens J, Truesdale KP, Wang C-H, Cai J, Erber E. Body mass index at age 25 and all-cause mortality in whites and African Americans: the Atherosclerosis Risk in Communities study. Journal of Adolescent Health. 2012 Mar 1;50(3):221–7.

8. Van Dam RM, Willett WC, Manson JE, Hu FB. The Relationship between Overweight in Adolescence and Premature Death in Women. *Annals of Internal Medicine*. 2006 Jul 18;145(2):91–7.
9. Wengreen HJ, Moncur C. Change in diet, physical activity, and body weight among young-adults during the transition from high school to college. *Nutrition Journal*. 2009 Dec 1;8(1):1-7. [Accessed 2019 Mar 23]. Available from: <https://doi.org/10.1186/1475-2891-8-32>
10. Niemeier HM, Raynor HA, Lloyd-Richardson EE, Rogers ML, Wing RR. Fast Food Consumption and Breakfast Skipping: Predictors of Weight Gain from Adolescence to Adulthood in a Nationally Representative Sample. *Journal of Adolescent Health*. 2006 Dec 1;39(6):842-9.
11. Timlin MT, Pereira MA. Breakfast Frequency and Quality in the Etiology of Adult Obesity and Chronic Diseases. *Nutrition Reviews*. 2007 Jun 1;65(6):268-81.
12. allAfrica. Namibia: Private Hospitals Over-Perform C-Sections. 2015. [Accessed 2019 Feb 21]. Available from: <https://allafrica.com/stories/201507170479.html>
13. Filipovic J. Inside a war on natural birth: c-sections as status symbol and “choice” as a myth. 2014. [Accessed 2019 Mar 15]. Available from: <https://www.theguardian.com/commentisfree/2014/apr/10/natural-birth-c-section-choice-brazil-forced-pregnancy>
14. Sifferlin A. C-Sections Should Only Be Done When Medically Necessary - World Health Organization. 2015. [Accessed 2019 Mar 15]. Available from: <http://time.com/3817774/c-sections-medically-necessary/>
15. Redden M. A third of people get major surgery to be born’: why are C-sections routine in the US? In: *The Guardian*. 2017. [Accessed 2019 Mar 15]. Available from:

<https://www.theguardian.com/lifeandstyle/2017/oct/04/one-in-three-us-births-happen-by-c-section-caesarean-births>

16. Dayi C, Gray A. South African Health Review: Health and Related Indicators. Health System Trust. 2016. [Accessed 2019 Mar 22]. Available from: <http://www.hst.org.za/publications/South%20African%20Health%20Reviews/SAHR%202016.pdf>
17. Zhou X, Brown CJ, Abdo Z, Davis CC, Hansmann MA, Joyce P, et al. Differences in the composition of vaginal microbial communities found in healthy Caucasian and black women. ISME Journal: Multidisciplinary Journal of Microbial Ecology. 2007 Jun 1;1(2):121-33. [Accessed 2019 Mar 23]. Available from: <http://dx.doi.org/10.1038/ismej.2007.12>
18. Penders J, Thijs C, Vink C, Stelma FF, Snijders B, Kummeling I, et al. Factors influencing the composition of the intestinal microbiota in early infancy. Pediatrics. 2006 Aug 1;118(2):511-21.
19. Yuan C, Gaskins AJ, Blaine AI, Zhang C, Gillman MW, Missmer SA, et al. Cesarean birth and risk of offspring obesity in childhood, adolescence and early adulthood. JAMA pediatrics. 2016 Nov 1;170(11):e162385. [Accessed 2019 Mar 23]. Available from: <https://jamanetwork.com/journals/jamapediatrics/fullarticle/2548440>
20. Darmasseelane K, Hyde MJ, Santhakumaran S, Gale C, Modi N. Mode of delivery and offspring body mass index, overweight and obesity in adult life: a systematic review and meta-analysis. Public Library of Science ONE. 2014 Feb 26;9(2):e87896-. [Accessed 2019 Mar 23]. Available from: <https://doi.org/10.1371/journal.pone.0087896>

21. Li H-T, Zhou Y-B, Liu J-M. The Impact of Cesarean Section on Offspring Overweight and Obesity: A Systematic Review and Meta-Analysis. *Obstetrical & Gynecological Survey*. 2014 Jul 1;37(7):893-900. [Accessed 2019 Mar 23]. Available from: <http://dx.doi.org/10.1038/ijo.2012.195>
22. Sutharsan R, Mannan M, Doi SA, Mamun AA. Caesarean delivery and the risk of offspring overweight and obesity over the life course: a systematic review and bias-adjusted meta-analysis. *Clinical Obesity*. 2015 Nov 23;5(6):293–301.
23. Mesquita DN, Barbieri MA, Goldani HA, Cardoso VC, Goldani MZ, Kac G, et al. Cesarean Section Is Associated with Increased Peripheral and Central Adiposity in Young Adulthood: Cohort Study. 2013 Jun 27;8(6):e66827
24. Bernardi JR, Goldani HAS, Pinheiro TV, Goldani MZ, Mueller NT, Bettiol H, et al. Cesarean delivery and metabolic risk factors in young adults: a Brazilian birth cohort study. *The American Journal of Clinical Nutrition*. 2015 Jun 17;102(2):295–301. [Accessed 2019 Mar 23]. Available from: <https://doi.org/10.3945/ajcn.114.105205>
25. Hansen S, Halldorsson TI, Olsen SF, Rytter D, Bech BH, Granström C, et al. Birth by cesarean section in relation to adult offspring overweight and biomarkers of cardiometabolic risk. *International Journal Of Obesity*. 2018 Jan 1;42(1):15-9. [Accessed 2019 Mar 23]. Available from: <http://dx.doi.org/10.1038/ijo.2017.175>
26. Barros AJD, Santos LP, Wehrmeister F, Motta JV dos S, Matijasevich A, Santos IS, et al. Caesarean section and adiposity at 6, 18 and 30 years of age: results from three Pelotas (Brazil) birth cohorts. *BMC Public Health*. 2017 Mar 14;17(1):256. [Accessed 2019 Mar 23]. Available from: <https://doi.org/10.1186/s12889-017-4165-3> pmid:28292278
27. Mamun AA, Sutharsan R, O’Callaghan M, Williams G, Najman J, McIntyre HD, et al. Cesarean Delivery and the Long-Term Risk of Offspring Obesity. *Obstetrics &*

Gynecology. 2013 Dec 1;122(6):1176-83. [Accessed 2019 Mar 22]. Available from:  
[http://journals.lww.com/greenjournal/Fulltext/2013/12000/Cesarean\\_Delivery\\_and\\_the\\_Long\\_Term\\_Risk\\_of.7.aspx](http://journals.lww.com/greenjournal/Fulltext/2013/12000/Cesarean_Delivery_and_the_Long_Term_Risk_of.7.aspx)

28. Barros FC, Matijasevich A, Hallal PC, Horta BL, Barros AJ, Menezes AB, et al. Cesarean section and risk of obesity in childhood, adolescence, and early adulthood: Evidence from 3 Brazilian birth cohorts. *American Journal of Clinical Nutrition*. 2012 Jan 11;95(2):465–70.

29. Huh SY, Rifas-Shiman SL, Zera CA, Edwards JWR, Oken E, Weiss ST, et al. Delivery by caesarean section and risk of obesity in preschool age children: a prospective cohort study. *Archives of Disease in Childhood*. 2012 Jul 1;97(7):610–6.

30. Goldani H, Bettiol H, Barbieri M, Silva A, Agranonik M, Morais M, et al. Cesarean delivery is associated with an increased risk of obesity in adulthood in a Brazilian birth cohort study. *American Journal of Clinical Nutrition*. 2011;93(6):1344–7. [Accessed 2019 Mar 23]. Available from: <https://doi.org/10.3945/ajcn.110.010033>

31. Goldani MZ, Barbieri MA, da Silva AAM, Gutierrez MRP, Bettiol H, Goldani HAS. Cesarean section and increased body mass index in school children: two cohort studies from distinct socioeconomic background areas in Brazil. *Nutrition Journal*. 2013 July25;12(1):104.

32. Horta BL, Gigante DP, Lima RC, Barros FC, Victora CG. Birth by caesarean section and prevalence of risk factors for non-communicable diseases in young adults: a birth cohort study. *PloS one*. 2013;8: e74301–e74301. doi:10.1371/journal.pone.0074301

33. Rooney B, Mathiason M, Schauburger C. Predictors of Obesity in Childhood, Adolescence, and Adulthood in a Birth Cohort. *Maternal & Child Health Journal*. 2011;15.
34. Flemming K, Woolcott CG, Allen AC, Veugelers PJ, Kuhle S. The association between caesarean section and childhood obesity revisited: a cohort study. *Archives of disease in childhood*. 2013;98: 526–532.
35. Masukume G, McCarthy FP, Baker PN, Kenny LC, Morton SM, Murray DM, et al. Association between caesarean section delivery and obesity in childhood: a longitudinal cohort study in Ireland. *BMJ open*. 2019;9: e025051.
36. Richter L, Norris S, Pettifor J, Yach D, Cameron N. Cohort Profile: Mandela’s children: the 1990 Birth to Twenty study in South Africa. *International journal of epidemiology*. 2007;36: 504–511. doi:10.1093/ije/dym016
37. Richter L, Yach D, Cameron N, Griesel R, De Wet T. Enrolment into Birth to Ten (BTT): population and sample characteristics. *Paediatric and perinatal epidemiology*. 1995;9: 109–120.
38. World Health Organization. Obesity: preventing and managing the global epidemic. 2000. Available: <https://goo.gl/3yD6KF>
39. Lee AC, Kozuki N, Cousens S, Stevens GA, Blencowe H, Silveira MF, et al. Estimates of burden and consequences of infants born small for gestational age in low and middle income countries with INTERGROWTH-21 (st) standard: analysis of CHERG datasets. *British Medical Journal (BMJ)*. 2017;358: j3677.
40. Schafer J. Multiple imputation: a primer. *Statistical Methods in Medical Research*. 1999;8: 3.
41. Bennett DA. How can I deal with missing data in my study? *Australian & New Zealand Journal of Public Health*. 2001;25: 464–464.

42. Kuhle S, Woolcott CG. Caesarean section is associated with offspring obesity in childhood and young adulthood. *Evidence-Based Medicine*. 2017;22: 111.
43. Dominguez-Bello MG, Costello EK, Contreras M, Magris M, Hidalgo G, Fierer N, et al. Delivery mode shapes the acquisition and structure of the initial microbiota across multiple body habitats in newborns. *Proceedings of the National Academy of Sciences*. 2010; 201002601.
44. Tun HM, Bridgman SL, Chari R, Field CJ, Guttman DS, Becker AB, et al. Roles of Birth Mode and Infant Gut Microbiota in Intergenerational Transmission of Overweight and Obesity From Mother to Offspring. *JAMA Pediatrics*. 2018;172: 368–377. doi:10.1001/jamapediatrics.2017.5535
45. Wampach L, Heintz-Buschart A, Fritz JV, Ramiro-Garcia J, Habier J, Herold M, et al. Birth mode is associated with earliest strain-conferred gut microbiome functions and immunostimulatory potential. *Nature Communications*. 2018;9: 5091. doi:10.1038/s41467-018-07631-x
46. Rodríguez JM, Murphy K, Stanton C, Ross RP, Kober OI, Juge N, et al. The composition of the gut microbiota throughout life, with an emphasis on early life. *Microbial Ecology in Health and Disease*. 2015;26.
47. Kalliomäki M, Collado MC, Salminen S, Isolauri E. early differences in fecal microbiota composition in children may predict overweight1-3. *The American Journal of Clinical Nutrition*. 2008;87: 534–538.
48. Huurre A, Kalliomäki M, Rautava S, Rinne M, Salminen S, Isolauri E. Mode of Delivery – Effects on Gut Microbiota and Humoral Immunity. *Neonatology*. 2008;93: 236–240. doi:10.1159/000111102

49. Benenati B, Biasucci G, Morelli L, Bessi E, Boehm G. Cesarean Delivery May Affect the Early Biodiversity of Intestinal Bacteria. *The Journal of Nutrition*. 2008;138: 1796S-1800S.
50. Chu SY, Kim SY, Schmid CH, Dietz PM, Callaghan WM, Lau J, et al. Maternal obesity and risk of cesarean delivery: a meta-analysis. *Obesity Reviews*. 2007;8: 385–394. doi:10.1111/j.1467-789X.2007.00397.x
51. Yu Z, Han S, Zhu J, Sun X, Ji C, Guo X. Pre-pregnancy body mass index in relation to infant birth weight and offspring overweight/obesity: a systematic review and meta-analysis. *PloS one*. 2013;8: e61627–e61627.
52. Mueller NT, Mao G, Bennet WL, Hourigan SK, Dominguez-Bello MG, Appel LJ, et al. Does vaginal delivery mitigate or strengthen the intergenerational association of overweight and obesity? Findings from the Boston Birth Cohort. *International journal of obesity (2005)*. 2017;41: 497–501.
52. Canavan TP, Simhan HN, Caritis S. An evidence-based approach to the evaluation and treatment of premature rupture of membranes: Part II. *Obstet Gynecol Surv*. 2004;59: 678–89.

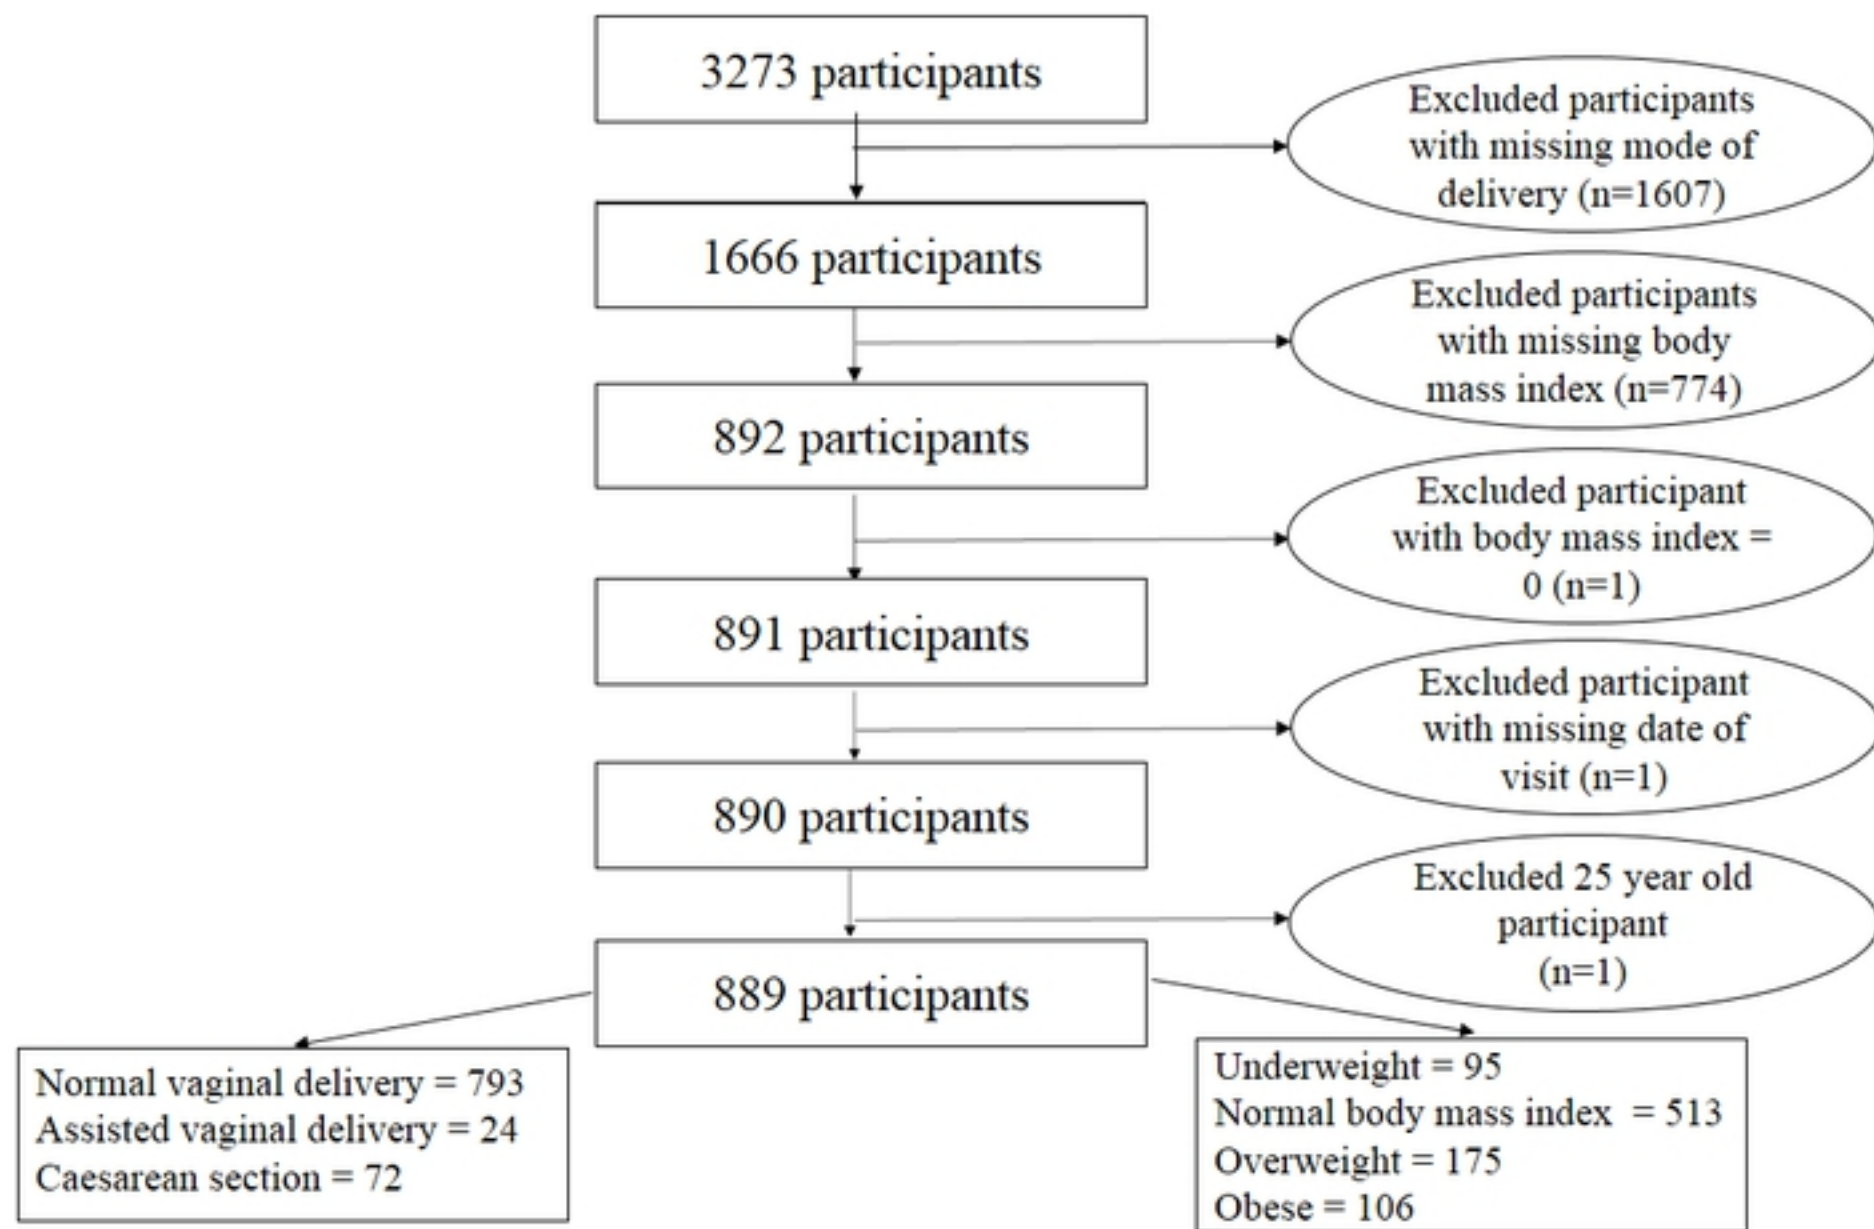

Figure
